# Supplementary material
Source: publisher site journal article supplement (https://www.dovepress.com/get_supplementary_file.php?f=483140.xlsx)
Supplement: Supplementary file 1 [file get_supplementary_file.php]

## Sheet: ALT
Supplementary Table 1
					ALT level (U/L in serum)
animal	drug	dosage of silibinin (mg/kg)	°N od dosages	received	CTRL	CTRL + SB	MODEL	MODEL + SB	total doses of silibinin	delta ALT	Effectivity	ref.
rat	silibinin	2000	1	per os	39.33	55.17			2000			https://doi.org/10.3389/fphar.2023.1111915
rat	silibinin	100	7	per os	55.1	44.9	90	54.3	700	-0.0229226	0.00146132	https://doi.org/10.5812/ircmj.17(4)2015.25310
Psammomys obesus	silibinin	100	56	per os	79		118	92	5600	0.333333	0.000119048	https://doi.org/10.1111/1753-0407.12083
rat	Siliphos	25	3	per os	22		123.9	127.3	75	1.03337	-0.000444881	https://doi.org/10.1254/jjp.60.315
rat	Siliphos	82.5	3	per os	22		123.9	89.7	247.5	0.664377	0.00135605	https://doi.org/10.1254/jjp.60.315
rat	Siliphos	250	3	per os	22		123.9	51.5	750	0.2895	0.000947334	https://doi.org/10.1254/jjp.60.315
rat	silibinin	25	3	per os	22		123.9	97.3	75	0.73896	0.00348054	https://doi.org/10.1254/jjp.60.315
rat	silibinin	250	3	per os	22		123.9	107.3	750	0.837095	0.000217206	https://doi.org/10.1254/jjp.60.315
rat	Siliphos	100	1	per os	28.2		1842	1428.5	100	0.772026	0.00227974	https://doi.org/10.1254/jjp.60.315
rat	Siliphos	200	1	per os	28.2		1842	725	200	0.384166	0.00307917	https://doi.org/10.1254/jjp.60.315
rat	Siliphos	400	1	per os	28.2		1842	447	400	0.230896	0.00192276	https://doi.org/10.1254/jjp.60.315
rat	Siliphos	800	1	per os	28.2		1842	77.3	800	0.0270702	0.00121616	https://doi.org/10.1254/jjp.60.315
rat	silibinin	100	1	per os	28.2		1842	3410	100	1.86448	-0.00864483	https://doi.org/10.1254/jjp.60.315
rat	silibinin	800	1	per os	28.2		1842	1901.8	800	1.03297	-4.12118e-05	https://doi.org/10.1254/jjp.60.315
hamster	silybin-phospholipid complex	50	56	per os	76.92		143.59	100	2800	0.346183	0.000233506	https://doi.org/10.1016/j.jep.2017.06.030
hamster	silybin-phospholipid complex	100	56	per os	76.92		143.59	120.51	5600	0.653817	6.18183e-05	https://doi.org/10.1016/j.jep.2017.06.030
rat	silibinin	100	21	per os	60		106.5	74.25	2100	0.306452	0.000330261	https://doi.org/10.1002/fsn3.3999
rat	silibinin	200	21	per os	60		106.5	71.25	4200	0.241935	0.000180492	https://doi.org/10.1002/fsn3.3999
rat	silibinin	100	15	per os	43.01	48.06	97.13	60.99	1500	0.332225	0.000445184	https://doi.org/10.1016/j.etap.2012.07.004
rat	silibinin	45	56	per os	6.64		43.77	13.52	2520	0.185295	0.000323296	https://doi.org/10.1016/j.jep.2023.116838
rat	silibinin–phosphatidylcholine complex	200	35	per os	28		39	31	7000	0.272727	0.000103896	https://doi.org/10.1093/ecam/nep164
mice	silibinin	86	42	per os	31.07		437.85	324.86	3612	0.722233	7.69011e-05	https://doi.org/10.1039/c6fo01591c
mice	silibinin-Puert tea extract	86	42	per os	31.07		437.85	221.37	3612	0.46782	0.000147337	https://doi.org/10.1039/c6fo01591c
rat	silibinin	22.8	28	per os	33.33		86.49	49.55	638.4	0.305117	0.00108848	https://doi.org/10.1016/j.biopha.2019.109354
mice	silibinin	300	3	per os	66.39		138.52	59.02	900	-0.102177	0.00122464	https://doi.org/10.1016/j.ijbiomac.2019.11.002
mice	silibinin	100	35	per os	28.25		411.57	306.43	3500	0.725712	7.83679e-05	https://doi.org/10.7150/ijbs.63732
mice	silibinin	100	35	per os	37.7		323.58	272.36	3500	0.820834	5.11903e-05	https://doi.org/10.7150/ijbs.63732
rat	silibinin	100	21	per os	24.15		42.07	22.66	2100	-0.0831473	0.000515784	https://doi.org/10.3390/ph17040431
rat	silibinin	100	33	per os	25.39		40.33	22.9	3300	-0.166667	0.000353535	https://doi.org/10.3390/ph17040431
mice	silibinin	100	3	per os	39.3		94	52.3	300	0.23766	0.00254113	https://doi.org/10.1248/bpb.28.531
mice	silibinin	10	42	per os	8.58		41.42	31.11	420	0.686054	0.000747491	https://doi.org/10.2147/DDDT.S209981
mice	silibinin	20	42	per os	8.58		41.42	26.81	840	0.555116	0.000529624	https://doi.org/10.2147/DDDT.S209981
mice	silibinin	63	14	per os	8.04		9.13	8.13	882	0.0825688	0.00104017	https://doi.org/10.3389/fmicb.2020.01113
rat	silibinin	75	28	per os	24.81	25.56	64.44	31.48	2100	0.168307	0.000396044	https://doi.org/10.3109/15376516.2011.647113
rat	silibinin	100	45	per os	42.24	45.27	74.17	53.06	4500	0.338866	0.000146919	https://doi.org/10.1177/0960327114567765
rat	silibinin	100	45	per os	42.24	45.27	122.22	91.39	4500	0.614529	8.56603e-05	https://doi.org/10.1016/j.etap.2016.07.014
rat	silibinin	100	45	per os	44.4444	48.6111	123.611	93.0556	4500	0.614035	8.577e-05	https://doi.org/10.1016/j.cbi.2017.06.008
rat	silibinin	200	21	per os	40.94		277.17	121.26	4200	0.340008	0.000157141	https://doi.org/10.1016/j.arabjc.2020.01.002
rat	nano silibinin	50	21	per os	40.94		277.17	129.13	1050	0.373323	0.000596836	https://doi.org/10.1016/j.arabjc.2020.01.002
rat	nano silibinin	100	21	per os	40.94		277.17	118.11	2100	0.326673	0.000320632	https://doi.org/10.1016/j.arabjc.2020.01.002
mice	silibinin	100	30	per os	59.43		89.71	80	3000	0.679326	0.000106891	https://doi.org/10.1016/j.pestbp.2023.105643
mice	silibinin	200	30	per os	59.43	58.29	89.71	71.43	6000	0.396301	0.000100616	https://doi.org/10.1016/j.pestbp.2023.105643
mice	nano silibinin	100	30	per os	59.43		89.71	68.57	3000	0.301849	0.000232717	https://doi.org/10.1016/j.pestbp.2023.105643
mice	nano silibinin	200	30	per os	59.43	56	89.71	60.57	6000	0.0376486	0.000160392	https://doi.org/10.1016/j.pestbp.2023.105643
rat	Siliphos	400	49	per os	53.87		121.21	87.94	19600	0.50594	2.52071e-05	https://doi.org/10.1124/jpet.109.161612
rat	Siliphos	400	98	per os	55.46		197.27	124.38	39200	0.486002	1.31122e-05	https://doi.org/10.1124/jpet.109.161612
rat	silibinin	100	14	per os	30.12	32.5	70.25	41.75	1400	0.289808	0.00050728	https://doi.org/10.1007/s12013-014-0331-8
mice	Silibin-phospholipid complex	25	2	per os	73.7705		357.923	188.525	50	0.403846	0.0119231	https://doi.org/10.1016/j.intimp.2023.109808
mice	silibinin	25	2	per os	73.7705		357.923	177.596	50	0.365385	0.0126923	https://doi.org/10.1016/j.intimp.2023.109808
mice	Silibinin	10	30	per os	10.64		30.5	34.4	300	1.19637	-0.000654582	https://doi.org/10.3390/pharmaceutics16050618
mice	nano silibinin	1	30	per os	10.64		30.5	23.05	30	0.624874	0.0125042	https://doi.org/10.3390/pharmaceutics16050618
mice	nano silibinin with ursodeoxycholic acid	1	30	per os	10.64		30.5	24.11	30	0.678248	0.0107251	https://doi.org/10.3390/pharmaceutics16050618
dog	nano silibinin	20	1	per os	41.94		601.61	396.77	20	0.633999	0.0183001	https://doi.org/10.1166/jbn.2012.1444
mice	silibinin	20	56	per os	9.23		192.31	63.08	1120	0.294134	0.000630238	https://doi.org/10.3389/fnut.2023.1257158
mice	Silibinin	100	7	per os	33.96		85.28	64.15	700	0.58827	0.000588186	https://doi.org/10.2147/DDDT.S356847
mice	Silibinin derivate SS	50	7	per os	33.96		85.28	67.17	350	0.647116	0.00100824	https://doi.org/10.2147/DDDT.S356847
mice	Silibinin derivate SS	100	7	per os	33.96		85.28	45.28	700	0.220577	0.00111346	https://doi.org/10.2147/DDDT.S356847
mice	Silibinin derivate ST	50	7	per os	33.96		85.28	66.42	350	0.632502	0.00104999	https://doi.org/10.2147/DDDT.S356847
mice	Silibinin derivate ST	100	7	per os	33.96		85.28	52.45	700	0.360288	0.000913874	https://doi.org/10.2147/DDDT.S356847
rat	silibinin	26.25	42	per os	264		450	304	1102.5	0.215054	0.000711969	https://doi.org/10.1590/S0100-879X2011007500083
rat	silibinin	26.75	42	per os	251		449	368	1123.5	0.590909	0.000364122	https://doi.org/10.1590/1414-431X20122551
rat	silibinin	5	84	per os	32.67		120.4	42.83	420	0.11581	0.00210521	https://doi.org/10.1016/j.biopha.2021.112409
rat	silibinin	5	31	per os	32.67		120.4	40	155	0.0835518	0.00591257	https://doi.org/10.1016/j.biopha.2021.112409
mice	silibinin	25	7	per os	40.1		13393.5	2125.31	175	0.156156	0.00482197	https://doi.org/10.3390/ijms19051329
mice	silibinin	48	84	per os	6.25		13.93	6.64	4032	0.0507812	0.000235421	https://doi.org/10.1016/j.phymed.2023.155173
rat	silibinin	30	2	i.p.	65.5	61.9	751.6	252.4	60	0.272409	0.0121265	https://doi.org/10.22038/ijbms.2019.34967.8313
rat	Silibinin dihydrogen succinate	100	5	i.p.	48		2038	1445	500	0.70201	0.00059598	https://doi.org/10.3109/08941930903469466
rat	silibinin	50	28	i.p.	47.33		90.33	72.16	1400	0.577442	0.000301827	https://doi.org/10.1371/journal.pone.0101818
rat	nano silibinin	50	28	i.p.	47.33		90.33	58	1400	0.24814	0.000537043	https://doi.org/10.1371/journal.pone.0101818
mice	silibinin	10	1	i.p.	18.72	16.04	75.4	58.85	10	0.70801	0.029199	https://doi.org/10.3389/fbioe.2020.00495
mice	silibinin nanoliposome	15	1	i.p.	73.61		304.12	114.29	15	0.176478	0.0549015	https://doi.org/10.1016/j.bbrc.2023.07.045
rat	silibinin	100	14	i.p.	31.2		91.8	22.9	1400	-0.136964	0.000812117	https://doi.org/10.1177/1535370216636719
rat	silibinin	100	14	i.p.	31.2		91.8	41	1400	0.161716	0.000598774	https://doi.org/10.1177/1535370216636719
rat	silibinin	50	4	i.p.					200			https://doi.org/10.1016/S0378-8741(01)00298-7
rat	silibinin + vit E	50	4	i.p.					200			https://doi.org/10.1016/S0378-8741(01)00298-7
mice	silibinin	60	1	i.p.	41.62		790.81	297.3	60	0.341275	0.0109787	https://doi.org/10.1016/j.bbagen.2007.12.012
mice	silibinin	400	1	i.p.	4.103		68.269	29.333	400	0.393199	0.001517	https://doi.org/10.1002/tox.20283
mice	silibinin	40	7	i.p.	11.32		75.47	12.58	280	0.0196415	0.00350128	https://doi.org/10.1155/2022/1708030
mice	silibinin	100	1	i.p.	42		89.6	54.5	100	0.262605	0.00737395	https://doi.org/10.1248/bpb.28.531
mice	silibinin	1	21	i.p.	1		2.03	1.32	21	0.31068	0.0328248	https://doi.org/10.3390/ijms19082165
mice	silibinin	150	1	i.p.	43.93		187.6	192.25	150	1.03237	-0.000215772	https://doi.org/10.1016/j.ijbiomac.2015.01.061
rat	silibinin	60	2	i.p.	62.45	58.78	742.04	253.47	120	0.281081	0.00599099	https://doi.org/10.1007/s11033-020-05383-w
mice	Silibinin dihydrogen succinate	20	28	i.p.	38.4		454.2	180.5	560	0.341751	0.00117544	https://doi.org/10.1016/j.dld.2011.11.010
mice	silibinin	20	28	i.p.	33.53		349.7	153.29	560	0.378784	0.00110932	https://doi.org/10.1016/j.trsl.2011.12.003
mice	silibinin (pre-treatment)	10	1	i.p.	61.3		252	152	10	0.475616	0.0524384	https://doi.org/10.1016/j.etap.2022.103868
mice	silibinin (post-treatment)	10	1	i.p.	61.3		252	213	10	0.79549	0.020451	https://doi.org/10.1016/j.etap.2022.103868
mice	LEGALON SIL	25	4	i.p.	61.8557	46.3918	1731.96	819.588	100	0.453704	0.00546296	https://doi.org/10.1016/S0168-8278(03)00239-3
mice	LEGALON SIL	25	4	i.p.	222.222	222.222	3777.78	4944.44	100	1.32812	-0.00328125	https://doi.org/10.1016/S0168-8278(03)00239-3
mice	silibinin	5	8	i.p.	3886.3		5829.46	2852.71	40	-0.531912	0.0382978	https://doi.org/10.1016/j.annemergmed.2006.12.015
rat	silibinin	50	7	i.p.	43.5		1166.86	150.67	350	0.0954013	0.00258457	https://doi.org/10.4103/0253-7613.55211
mice	silibinin	20	8	i.p.	38.89		172.22	135.19	160	0.722268	0.00173582	https://doi.org/10.1615/IntJMedMushr.v15.i4.60
mice	silibinin	20	8	i.p.	29.07		167.13	61.76	160	0.236781	0.00477012	https://doi.org/10.1615/IntJMedMushrooms.v18.i9.80
rat	silibinin	25	5	i.p.	67.5		28	26.3	125	1.04304	-0.000344304	https://doi.org/10.5152/eurasianjmed.2022.20371
rat	silibinin	50	5	i.p.	67.5		28	33.9	250	0.850633	0.000597468	https://doi.org/10.5152/eurasianjmed.2022.20371
rat	silibinin	100	5	i.p.	67.5		28	30.6	500	0.934177	0.000131646	https://doi.org/10.5152/eurasianjmed.2022.20371
rat	silibinin	50	7	i.p.	44.5		474.86	218.8	350	0.40501	0.00169997	https://doi.org/10.1155/2013/461478
rat	Silibinin dihydrogen succinate	30	2	i.p.	73.47	73.47	1314.29	502.04	60	0.345393	0.0109101	https://doi.org/10.22037/ghfbb.v14i3.2171
mice	silibinin	20	1	i.v.	46.3		1768.52	1222.22	20	0.682793	0.0158603	https://doi.org/10.1016/j.actbio.2022.04.021
mice	silibinin-BSA nanoparticles	20	1	i.v.	46.3		1768.52	351.85	20	0.177416	0.0411292	https://doi.org/10.1016/j.actbio.2022.04.021
mice	silibinin	20	1	i.v.	29.41		2852.94	1735.29	20	0.604166	0.0197917	https://doi.org/10.1016/j.actbio.2022.04.021
mice	silibinin-BSA nanoparticles	20	1	i.v.	29.41		2852.94	617.65	20	0.208335	0.0395833	https://doi.org/10.1016/j.actbio.2022.04.021
mice	PLGA nano silibinin	10	1	i.v.	18.72		75.4	42.25	10	0.415138	0.0584862	https://doi.org/10.3389/fbioe.2020.00495
mice	silibinin nanoliposome	15	1	i.v.	73.61	151.09	304.12	292.49	15	0.949547	0.00336356	https://doi.org/10.1016/j.bbrc.2023.07.045
rat	silibinin	5	4	i.v.	45.26		370.8	313.87	20	0.825121	0.00874393	https://doi.org/10.1016/j.apsb.2019.07.003
rat	silibinin micelles	5	4	i.v.	45.26		370.8	220.44	20	0.538121	0.0230939	https://doi.org/10.1016/j.apsb.2019.07.003
rat	silibinin HA micelles	5	4	i.v.	45.26		370.8	62.77	20	0.0537876	0.0473106	https://doi.org/10.1016/j.apsb.2019.07.003
rat	silibinin	5	6	i.v.	51.47		429.41	369.12	30	0.840477	0.00531742	https://doi.org/10.1016/j.apsb.2019.07.003
rat	silibinin micelles	5	6	i.v.	51.47		429.41	279.41	30	0.603112	0.0132296	https://doi.org/10.1016/j.apsb.2019.07.003
rat	silibinin HA micelles	5	6	i.v.	51.47		429.41	66.18	30	0.0389215	0.0320359	https://doi.org/10.1016/j.apsb.2019.07.003
rat	silibinin	5	8	i.v.	49.88		484.11	413.69	40	0.837828	0.0040543	https://doi.org/10.1016/j.apsb.2019.07.003
rat	silibinin micelles	5	8	i.v.	49.88		484.11	324.21	40	0.631762	0.00920595	https://doi.org/10.1016/j.apsb.2019.07.003
rat	silibinin HA micelles	5	8	i.v.	49.88		484.11	68.95	40	0.0439168	0.0239021	https://doi.org/10.1016/j.apsb.2019.07.003
mice	nano silibinin	15	10	i.v.	69		408.6	145.7	150	0.225854	0.00516097	https://doi.org/10.1208/s12249-019-1504-y
mice	nano silibinin	30	10	i.v.	69		408.6	94.3	300	0.0744994	0.003085	https://doi.org/10.1208/s12249-019-1504-y
mice	nano silibinin-Collagenase I	5	4	i.v.	76.26		158.27	71.94	20	-0.0526765	0.0526338	https://doi.org/10.1016/j.carbpol.2021.117964
mice	nano silibinin	5	4	i.v.	76.26		158.27	132.37	20	0.684185	0.0157908	https://doi.org/10.1016/j.carbpol.2021.117964
mice	silibinin-Collagenase I	5	4	i.v.	76.26		158.27	130.94	20	0.666748	0.0166626	https://doi.org/10.1016/j.carbpol.2021.117964
mice	silibinin	10	4	i.v.	40.29		564.03	437.41	40	0.758239	0.00604403	https://doi.org/10.1021/acsami.2c19269
mice	silibinin	20	4	i.v.	40.29		564.03	414.39	80	0.714286	0.00357143	https://doi.org/10.1021/acsami.2c19269
mice	nano silibinin	10	4	i.v.	40.29		564.03	115.11	40	0.142857	0.0214286	https://doi.org/10.1021/acsami.2c19269
mice	nano silibinin	20	4	i.v.	40.29		564.03	63.31	80	0.0439531	0.0119506	https://doi.org/10.1021/acsami.2c19269
mice	silibinin	4	8	i.v.	30		151.25	70	32	0.329897	0.0209407	https://doi.org/10.1016/j.jconrel.2018.05.032
mice	nano silibinin	4	8	i.v.	30		151.25	51.25	32	0.175258	0.0257732	https://doi.org/10.1016/j.jconrel.2018.05.032
mice	silibinin sodium hemisuccinate salt	100	1	i.v.	62.5		214	117.33	100	0.361914	0.00638086	https://doi.org/10.1016/0041-008X(79)90469-1
dog	silibinin	15	1	i.v.	41.94		601.61	303.23	15	0.466864	0.0355424	https://doi.org/10.1166/jbn.2012.1444
dog	nano silibinin	15	1	i.v.	41.94		601.61	72.58	15	0.0547465	0.0630169	https://doi.org/10.1166/jbn.2012.1444
mice	silibinin	8	8	i.v.	43.73		607.07	568.49	64	0.931516	0.00107007	https://doi.org/10.2147/IJN.S407762
mice	nano silibinin	8	8	i.v.	43.73		607.07	210.93	64	0.296801	0.0109875	https://doi.org/10.2147/IJN.S407762
mice	nano silibinin + hyaluronic acid	8	8	i.v.	43.73		607.07	123.47	64	0.141549	0.0134133	https://doi.org/10.2147/IJN.S407762
mice	silibinin	8	5	i.v.	72.26		668.39	645.16	40	0.961032	0.0009742	https://doi.org/10.2147/IJN.S407762
mice	nano silibinin	8	5	i.v.	72.26		668.39	183.23	40	0.186151	0.0203462	https://doi.org/10.2147/IJN.S407762
mice	nano silibinin + hyaluronic acid	8	5	i.v.	72.26		668.39	141.94	40	0.116887	0.0220778	https://doi.org/10.2147/IJN.S407762
mice	silibinin	12.5	3	i.v.	47.32		1256.21	993.62	37.5	0.782784	0.00579242	https://doi.org/10.1016/j.biomaterials.2014.04.037
mice	nano silibinin	12.5	3	i.v.	47.32		1256.21	678.93	37.5	0.522471	0.0127341	https://doi.org/10.1016/j.biomaterials.2014.04.037
mice	nano silibinin + HBVpreS-derived lipopeptide	12.5	3	i.v.	47.32		1256.21	347.33	37.5	0.24817	0.0200488	https://doi.org/10.1016/j.biomaterials.2014.04.037
									;
	pure silibinin
	silibinin nanoparticles
	combination with phospholipids
	water-soluble silibinin
	combination with other supplements

## Sheet: AST
Supplementary Table 1
					AST level (U/L in serum)
animal	drug	dosage of silibinin (mg/kg)	°N od dosages	received	CTRL	CTRL + SB	MODEL	MODEL + SB	total doses of silibinin	delta AST	Effectivity	ref.
rat	silibinin	2000	1	per os	63.33	77.5			2000			https://doi.org/10.3389/fphar.2023.1111915
rat	silibinin	100	7	per os	107.6	90.5	80	105	700	0.0942029	0.001294	https://doi.org/10.5812/ircmj.17(4)2015.25310
Psammomys obesus	silibinin	100	56	per os	82		123	101.8	5600	0.482927	9.23345e-05	https://doi.org/10.1111/1753-0407.12083
rat	Siliphos	25	3	per os	87.2		335.1	300	75	0.858411	0.00188786	https://doi.org/10.1254/jjp.60.315
rat	Siliphos	82.5	3	per os	87.2		335.1	238	247.5	0.60831	0.00158259	https://doi.org/10.1254/jjp.60.315
rat	Siliphos	250	3	per os	87.2		335.1	145.1	750	0.233562	0.00102192	https://doi.org/10.1254/jjp.60.315
rat	silibinin	25	3	per os	87.2		335.1	261.9	75	0.70472	0.00393707	https://doi.org/10.1254/jjp.60.315
rat	silibinin	250	3	per os	87.2		335.1	249.8	750	0.65591	0.000458787	https://doi.org/10.1254/jjp.60.315
rat	Siliphos	100	1	per os	114		2070	1470.7	100	0.693609	0.00306391	https://doi.org/10.1254/jjp.60.315
rat	Siliphos	200	1	per os	114		2070	649.2	200	0.27362	0.0036319	https://doi.org/10.1254/jjp.60.315
rat	Siliphos	400	1	per os	114		2070	463.3	400	0.178579	0.00205355	https://doi.org/10.1254/jjp.60.315
rat	Siliphos	800	1	per os	114		2070	186.1	800	0.0368609	0.00120392	https://doi.org/10.1254/jjp.60.315
rat	silibinin	100	1	per os	114		2070	3728.3	100	1.8478	-0.00847802	https://doi.org/10.1254/jjp.60.315
rat	silibinin	800	1	per os	114		2070	2912.4	800	1.43067	-0.000538344	https://doi.org/10.1254/jjp.60.315
hamster	silybin-phospholipid complex	50	56	per os	103.23		148.39	63.23	2800	-0.88574	0.000673478	https://doi.org/10.1016/j.jep.2017.06.030
hamster	silybin-phospholipid complex	100	56	per os	103.23		148.39	108.39	5600	0.11426	0.000158168	https://doi.org/10.1016/j.jep.2017.06.030
rat	silibinin	100	21	per os	115.33		126.63	102.51	2100	-1.13451	0.00101643	https://doi.org/10.1002/fsn3.3999
rat	silibinin	200	21	per os	115.33		126.63	128.14	4200	1.13363	-3.18163e-05	https://doi.org/10.1002/fsn3.3999
rat	silibinin	100	15	per os	41.42	46.57	94.78	65.69	1500	0.454835	0.000363443	https://doi.org/10.1016/j.etap.2012.07.004
rat	silibinin	45	56	per os	6.15		30.94	10.45	2520	0.173457	0.000327993	https://doi.org/10.1016/j.jep.2023.116838
rat	silibinin–phosphatidylcholine complex	200	35	per os	57		64	63	7000	0.857143	2.04082e-05	https://doi.org/10.1093/ecam/nep164
mice	silibinin	86	42	per os	96.67		268.33	248.33	3612	0.883491	3.22562e-05	https://doi.org/10.1039/c6fo01591c
mice	silibinin-Puert tea extract	86	42	per os	96.67		268.33	197.55	3612	0.587673	0.000114155	https://doi.org/10.1039/c6fo01591c
rat	silibinin	22.8	28	per os	113.89		268.06	173.61	638.4	0.387365	0.000959642	https://doi.org/10.1016/j.biopha.2019.109354
mice	silibinin	300	3	per os	68.09		179.88	79.27	900	0.100009	0.00099999	https://doi.org/10.1016/j.ijbiomac.2019.11.002
mice	silibinin	100	35	per os	124.35		466.68	342.23	3500	0.636462	0.000103868	https://doi.org/10.7150/ijbs.63732
mice	silibinin	100	35	per os	150.05		308.15	253.98	3500	0.657369	9.78946e-05	https://doi.org/10.7150/ijbs.63732
rat	silibinin	100	21	per os	64.73		111.41	48.55	2100	-0.346615	0.000641245	https://doi.org/10.3390/ph17040431
rat	silibinin	100	33	per os	59.13		101.45	51.04	3300	-0.191163	0.000360958	https://doi.org/10.3390/ph17040431
mice	silibinin	100	3	per os	54.5		120.3	60.5	300	0.0911854	0.00302938	https://doi.org/10.1248/bpb.28.531
mice	silibinin	10	42	per os	21.37		40.32	39.19	420	0.940369	0.000141978	https://doi.org/10.2147/DDDT.S209981
mice	silibinin	20	42	per os	21.37		40.32	31.46	840	0.532454	0.000556603	https://doi.org/10.2147/DDDT.S209981
mice	silibinin	63	14	per os	23.12		31.72	26.88	882	0.437209	0.000638085	https://doi.org/10.3389/fmicb.2020.01113
rat	silibinin	75	28	per os	74.65	72.81	147.47	87.55	2100	0.177149	0.000391834	https://doi.org/10.3109/15376516.2011.647113
rat	silibinin	100	45	per os					4500			https://doi.org/10.1177/0960327114567765
rat	silibinin	100	45	per os	40.69	43.33	89.17	66.94	4500	0.54146	0.000101898	https://doi.org/10.1016/j.etap.2016.07.014
rat	silibinin	100	45	per os	41.3043	43.4783	89.1304	67.3913	4500	0.545455	0.00010101	https://doi.org/10.1016/j.cbi.2017.06.008
rat	silibinin	200	21	per os	39.37		475.59	137.01	4200	0.223832	0.000184802	https://doi.org/10.1016/j.arabjc.2020.01.002
rat	nano silibinin	50	21	per os	39.37		475.59	212.6	1050	0.397116	0.000574175	https://doi.org/10.1016/j.arabjc.2020.01.002
rat	nano silibinin	100	21	per os	39.37		475.59	188.98	2100	0.342969	0.000312872	https://doi.org/10.1016/j.arabjc.2020.01.002
mice	silibinin	100	30	per os	103.86		172.71	161.84	3000	0.842121	5.26265e-05	https://doi.org/10.1016/j.pestbp.2023.105643
mice	silibinin	200	30	per os	103.86	102.66	172.71	143.72	6000	0.57894	7.01767e-05	https://doi.org/10.1016/j.pestbp.2023.105643
mice	nano silibinin	100	30	per os	103.86		172.71	131.64	3000	0.403486	0.000198838	https://doi.org/10.1016/j.pestbp.2023.105643
mice	nano silibinin	200	30	per os	103.86	101.45	172.71	117.15	6000	0.193028	0.000134495	https://doi.org/10.1016/j.pestbp.2023.105643
rat	Siliphos	400	49	per os					19600			https://doi.org/10.1124/jpet.109.161612
rat	Siliphos	400	98	per os					39200			https://doi.org/10.1124/jpet.109.161612
rat	silibinin	100	14	per os	86.62	94.25	209	125.5	1400	0.317699	0.000487358	https://doi.org/10.1007/s12013-014-0331-8
mice	Silibin-phospholipid complex	25	2	per os	170.492		455.738	229.508	50	0.206897	0.0158621	https://doi.org/10.1016/j.intimp.2023.109808
mice	silibinin	25	2	per os	170.492		455.738	249.18	50	0.275861	0.0144828	https://doi.org/10.1016/j.intimp.2023.109808
mice	Silibinin	10	30	per os	33.38		56.98	59.28	300	1.09746	-0.000324859	https://doi.org/10.3390/pharmaceutics16050618
mice	nano silibinin	1	30	per os	33.38		56.98	57.55	30	1.02415	-0.000805085	https://doi.org/10.3390/pharmaceutics16050618
mice	nano silibinin with ursodeoxycholic acid	1	30	per os	33.38		56.98	48.35	30	0.634322	0.0121893	https://doi.org/10.3390/pharmaceutics16050618
dog	nano silibinin	20	1	per os	17		1107.54	540.98	20	0.480478	0.0259761	https://doi.org/10.1166/jbn.2012.1444
mice	silibinin	20	56	per os	86.15		252.31	209.23	1120	0.740732	0.000231489	https://doi.org/10.3389/fnut.2023.1257158
mice	Silibinin	100	7	per os	134.15		198.77	175.66	700	0.642371	0.000510899	https://doi.org/10.2147/DDDT.S356847
mice	Silibinin derivate SS	50	7	per os	134.15		198.77	180.38	350	0.715413	0.000813105	https://doi.org/10.2147/DDDT.S356847
mice	Silibinin derivate SS	100	7	per os	134.15		198.77	162.45	700	0.437945	0.000802936	https://doi.org/10.2147/DDDT.S356847
mice	Silibinin derivate ST	50	7	per os	134.15		198.77	174.72	350	0.627824	0.00106336	https://doi.org/10.2147/DDDT.S356847
mice	Silibinin derivate ST	100	7	per os	134.15		198.77	151.13	700	0.262767	0.00105319	https://doi.org/10.2147/DDDT.S356847
rat	silibinin	26.25	42	per os	196		460	267	1102.5	0.268939	0.000663094	https://doi.org/10.1590/S0100-879X2011007500083
rat	silibinin	5	84	per os	103.2		234.8	114.8	420	0.0881459	0.00217108	https://doi.org/10.1590/1414-431X20122551
rat	silibinin	5	31	per os	103.2		234.8	112.7	155	0.0721884	0.00598588	https://doi.org/10.1016/j.biopha.2021.112409
rat	silibinin	26.75	42	per os	196		472	304	1123.5	0.391304	0.000541785	https://doi.org/10.1016/j.biopha.2021.112409
mice	silibinin	25	7	per os	142.13		11015.2	1279.19	175	0.104576	0.00511671	https://doi.org/10.3390/ijms19051329
mice	silibinin	48	84	per os	17.49		28.96	20.22	4032	0.238012	0.000188985	https://doi.org/10.1016/j.phymed.2023.155173
rat	silibinin	30	2	i.p.	125.2	122.3	610.8	251.3	60	0.259679	0.0123387	https://doi.org/10.22038/ijbms.2019.34967.8313
rat	Silibinin dihydrogen succinate	100	5	i.p.	166		2311	1808	500	0.765501	0.000468998	https://doi.org/10.3109/08941930903469466
rat	silibinin	50	28	i.p.	94		168	132.66	1400	0.522432	0.00034112	https://doi.org/10.1371/journal.pone.0101818
rat	nano silibinin	50	28	i.p.	94		168	109.16	1400	0.204865	0.000567954	https://doi.org/10.1371/journal.pone.0101818
mice	silibinin	10	1	i.p.	39.1	37.5	74.2	39.1	10	0	0.1	https://doi.org/10.3389/fbioe.2020.00495
mice	silibinin nanoliposome	15	1	i.p.	184.75		290.32	232.26	15	0.450033	0.0366645	https://doi.org/10.1016/j.bbrc.2023.07.045
rat	silibinin	100	14	i.p.	60.4		190.2	66	1400	0.0431433	0.000683469	https://doi.org/10.1177/1535370216636719
rat	silibinin	100	14	i.p.	60.4		190.2	79.6	1400	0.14792	0.000608629	https://doi.org/10.1177/1535370216636719
rat	silibinin	50	4	i.p.	200		582.13	394.89	200	0.51001	0.00244995	https://doi.org/10.1016/S0378-8741(01)00298-7
rat	silibinin + vit E	50	4	i.p.	200		582.13	217.87	200	0.0467642	0.00476618	https://doi.org/10.1016/S0378-8741(01)00298-7
mice	silibinin	60	1	i.p.	44.59		478.65	374.59	60	0.760264	0.00399561	https://doi.org/10.1016/j.bbagen.2007.12.012
mice	silibinin	400	1	i.p.	6.635		110.871	103.712	400	0.931319	0.000171702	https://doi.org/10.1002/tox.20283
mice	silibinin	40	7	i.p.	21.77		52.79	21.77	280	0	0.00357143	https://doi.org/10.1155/2022/1708030
mice	silibinin	100	1	i.p.	58.7		123.8	70.5	100	0.18126	0.0081874	https://doi.org/10.1248/bpb.28.531
mice	silibinin	1	21	i.p.	1.07		5.69	1.24	21	0.0367965	0.0458668	https://doi.org/10.3390/ijms19082165
mice	silibinin	150	1	i.p.	56.33		107.49	125.06	150	1.34343	-0.00228955	https://doi.org/10.1016/j.ijbiomac.2015.01.061
rat	silibinin	60	2	i.p.	124.9	124.9	624.49	260.82	120	0.272063	0.00606614	https://doi.org/10.1007/s11033-020-05383-w
mice	Silibinin dihydrogen succinate	20	28	i.p.					560			https://doi.org/10.1016/j.dld.2011.11.010
mice	silibinin	20	28	i.p.	71.86		81.44	69.46	560	-0.250522	0.00223307	https://doi.org/10.1016/j.trsl.2011.12.003
mice	silibinin (pre-treatment)	10	1	i.p.	165		361	200	10	0.178571	0.0821429	https://doi.org/10.1016/j.etap.2022.103868
mice	silibinin (post-treatment)	10	1	i.p.	165		361	269	10	0.530612	0.0469388	https://doi.org/10.1016/j.etap.2022.103868
mice	LEGALON SIL	25	4	i.p.	46.3918	61.8557	1206.19	371.134	100	0.28	0.0072	https://doi.org/10.1016/S0168-8278(03)00239-3
mice	LEGALON SIL	25	4	i.p.	166.667	166.667	1444.44	2222.22	100	1.6087	-0.00608696	https://doi.org/10.1016/S0168-8278(03)00239-3
mice	silibinin	5	8	i.p.	2480.62		4341.09	2604.65	40	0.066666	0.0233334	https://doi.org/10.1016/j.annemergmed.2006.12.015
rat	silibinin	50	7	i.p.	157		2030.86	549.33	350	0.20937	0.00225894	https://doi.org/10.4103/0253-7613.55211
mice	silibinin	20	8	i.p.	129.63		187.04	161.11	160	0.548337	0.0028229	https://doi.org/10.1615/IntJMedMushr.v15.i4.60
mice	silibinin	20	8	i.p.	119.9		185.13	61.76	160	-0.891308	0.0118207	https://doi.org/10.1615/IntJMedMushrooms.v18.i9.80
rat	silibinin	25	5	i.p.	137.9		114.8	101	125	1.5974	-0.00477922	https://doi.org/10.5152/eurasianjmed.2022.20371
rat	silibinin	50	5	i.p.	137.9		114.8	116	250	0.948052	0.000207792	https://doi.org/10.5152/eurasianjmed.2022.20371
rat	silibinin	100	5	i.p.	137.9		114.8	125.6	500	0.532468	0.000935065	https://doi.org/10.5152/eurasianjmed.2022.20371
rat	silibinin	50	7	i.p.	145.5		892.57	518.8	350	0.499685	0.00142947	https://doi.org/10.1155/2013/461478
rat	Silibinin dihydrogen succinate	30	2	i.p.	134.69	130.61	1261.22	432.65	60	0.264494	0.0122584	https://doi.org/10.22037/ghfbb.v14i3.2171
mice	silibinin	20	1	i.v.	100.59		1000	609.46	20	0.565782	0.0217109	https://doi.org/10.1016/j.actbio.2022.04.021
mice	silibinin-BSA nanoparticles	20	1	i.v.	100.59		1000	189.34	20	0.0986758	0.0450662	https://doi.org/10.1016/j.actbio.2022.04.021
mice	silibinin	20	1	i.v.	90.91		1227.27	606.06	20	0.453333	0.0273333	https://doi.org/10.1016/j.actbio.2022.04.021
mice	silibinin-BSA nanoparticles	20	1	i.v.	90.91		1227.27	393.94	20	0.266667	0.0366666	https://doi.org/10.1016/j.actbio.2022.04.021
mice	PLGA nano silibinin	10	1	i.v.	39.1		74.2	32.71	10	-0.182051	0.118205	https://doi.org/10.3389/fbioe.2020.00495
mice	silibinin nanoliposome	15	1	i.v.	184.75	258.65	290.32	292.08	15	1.01667	-0.00111143	https://doi.org/10.1016/j.bbrc.2023.07.045
rat	silibinin	5	4	i.v.	136.25		1289.54	1021.9	20	0.767933	0.0116033	https://doi.org/10.1016/j.apsb.2019.07.003
rat	silibinin micelles	5	4	i.v.	136.25		1289.54	540.15	20	0.350215	0.0324892	https://doi.org/10.1016/j.apsb.2019.07.003
rat	silibinin HA micelles	5	4	i.v.	136.25		1289.54	170.32	20	0.0295416	0.0485229	https://doi.org/10.1016/j.apsb.2019.07.003
rat	silibinin	5	6	i.v.	147.06		1436.27	1245.1	30	0.851715	0.00494282	https://doi.org/10.1016/j.apsb.2019.07.003
rat	silibinin micelles	5	6	i.v.	147.06		1436.27	622.55	30	0.368823	0.0210392	https://doi.org/10.1016/j.apsb.2019.07.003
rat	silibinin HA micelles	5	6	i.v.	147.06		1436.27	176.47	30	0.0228124	0.0325729	https://doi.org/10.1016/j.apsb.2019.07.003
rat	silibinin	5	8	i.v.	151.59		1711.49	1559.9	40	0.902821	0.00242948	https://doi.org/10.1016/j.apsb.2019.07.003
rat	silibinin micelles	5	8	i.v.	151.59		1711.49	762.84	40	0.391852	0.0152037	https://doi.org/10.1016/j.apsb.2019.07.003
rat	silibinin HA micelles	5	8	i.v.	151.59		1711.49	200.49	40	0.0313482	0.0242163	https://doi.org/10.1016/j.apsb.2019.07.003
mice	nano silibinin	15	10	i.v.	158.3		486.2	204	150	0.139372	0.00573752	https://doi.org/10.1208/s12249-019-1504-y
mice	nano silibinin	30	10	i.v.	158.3		486.2	175.4	300	0.05215	0.0031595	https://doi.org/10.1208/s12249-019-1504-y
mice	nano silibinin-Collagenase I	5	4	i.v.	125.71		249.14	121.14	20	-0.037025	0.0518513	https://doi.org/10.1016/j.carbpol.2021.117964
mice	nano silibinin	5	4	i.v.	125.71		249.14	201.14	20	0.611116	0.0194442	https://doi.org/10.1016/j.carbpol.2021.117964
mice	silibinin-Collagenase I	5	4	i.v.	125.71		249.14	235.43	20	0.888925	0.00555376	https://doi.org/10.1016/j.carbpol.2021.117964
mice	silibinin	10	4	i.v.	141.84		730.5	531.91	40	0.662641	0.00843399	https://doi.org/10.1021/acsami.2c19269
mice	silibinin	20	4	i.v.	141.84		730.5	496.45	80	0.602402	0.00496997	https://doi.org/10.1021/acsami.2c19269
mice	nano silibinin	10	4	i.v.	141.84		730.5	219.86	40	0.132538	0.0216865	https://doi.org/10.1021/acsami.2c19269
mice	nano silibinin	20	4	i.v.	141.84		730.5	170.21	80	0.0481942	0.0118976	https://doi.org/10.1021/acsami.2c19269
mice	silibinin	4	8	i.v.	115.38		381.41	217.95	32	0.385558	0.0192013	https://doi.org/10.1016/j.jconrel.2018.05.032
mice	nano silibinin	4	8	i.v.	115.38		381.41	160.26	32	0.168703	0.025978	https://doi.org/10.1016/j.jconrel.2018.05.032
mice	silibinin sodium hemisuccinate salt	100	1	i.v.	132.83		287.75	195.22	100	0.402724	0.00597276	https://doi.org/10.1016/0041-008X(79)90469-1
dog	silibinin	15	1	i.v.	17		1107.54	598.03	15	0.532791	0.0311473	https://doi.org/10.1166/jbn.2012.1444
dog	nano silibinin	15	1	i.v.	17		1107.54	255.74	15	0.218919	0.0520721	https://doi.org/10.1166/jbn.2012.1444
mice	silibinin	8	8	i.v.	135.05		787.78	704.18	64	0.871923	0.00200121	https://doi.org/10.2147/IJN.S407762
mice	nano silibinin	8	8	i.v.	135.05		787.78	356.91	64	0.339896	0.0103141	https://doi.org/10.2147/IJN.S407762
mice	nano silibinin + hyaluronic acid	8	8	i.v.	135.05		787.78	180.06	64	0.0689565	0.0145476	https://doi.org/10.2147/IJN.S407762
mice	silibinin	8	5	i.v.	177.99		737.86	708.74	40	0.947988	0.0013003	https://doi.org/10.2147/IJN.S407762
mice	nano silibinin	8	5	i.v.	177.99		737.86	378.74	40	0.358565	0.0160359	https://doi.org/10.2147/IJN.S407762
mice	nano silibinin + hyaluronic acid	8	5	i.v.	177.99		737.86	249.19	40	0.127172	0.0218207	https://doi.org/10.2147/IJN.S407762
mice	silibinin	12.5	3	i.v.	106.32		1874.45	1352.16	37.5	0.704609	0.0078771	https://doi.org/10.1016/j.biomaterials.2014.04.037
mice	nano silibinin	12.5	3	i.v.	106.32		1874.45	1037.57	37.5	0.526686	0.0126217	https://doi.org/10.1016/j.biomaterials.2014.04.037
mice	nano silibinin + HBVpreS-derived lipopeptide	12.5	3	i.v.	106.32		1874.45	634.41	37.5	0.298671	0.0187021	https://doi.org/10.1016/j.biomaterials.2014.04.037
	pure silibinin
	silibinin nanoparticles
	combination with phospholipids
	water-soluble silibinin
	combination with other supplements
